# Supplementary material
Source: PubMed Central journal article supplement (PMC124512)
Supplement: pnas_99_10_6967__1.pdf [file pnas_99_10_6967__1.pdf]

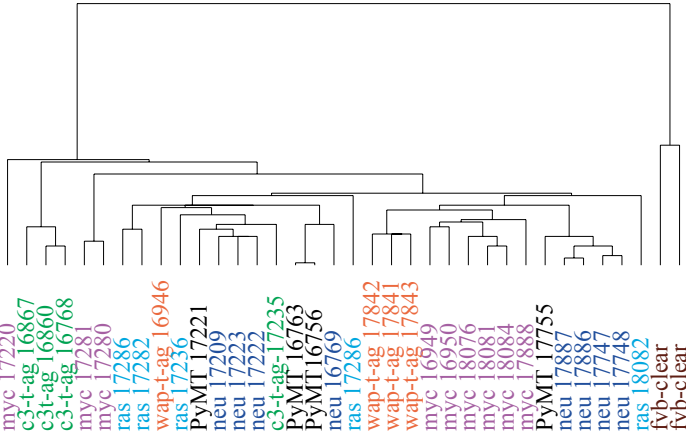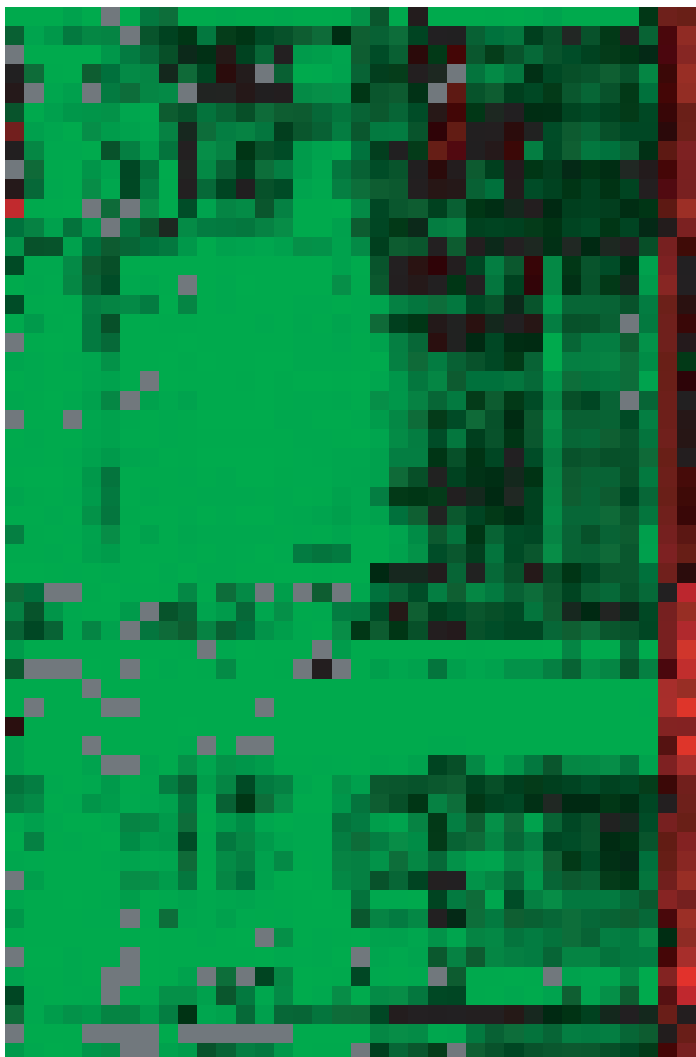

- procollagen, type III, alpha
- receptor IL-9R
- isocitrate dehydrogenase 1
- RIKEN cDNA 1110003P10 gene
- solute carrier family 10
- isocitrate dehydrogenase 3
- RIKEN cDNA 11T0032G10 gene
- Unknown
- RIKEN cDNA 1110020G17 gene
- RIKEN cDNA 1110020G17 gene
- ESTs
- RIKEN cDNA 6030455P07 gene
- RIKEN cDNA 6330408J20 gene
- TF six1
- TF homeotic 7
- TF HZF1
- stress heat related
- RIKEN cDNA 1110061B18 gene
- RIKEN cDNA 1500032L24 gene
- pecanex homolog Drosophila
- RIKEN cDNA 2610016C12 gene
- TF HOX5.4
- osteopontin
- TF NF-ATc
- Synaptophysin
- synaptobrevin
- ESTs
- RIKEN cDNA 2700069E09 gene
- hemopoietic cell kinase
- hormone melanin conc.
- ESTs
- stress superox. dismut2
- Catechol-O-methyltransferase
- CD36
- c-mer tyrosine kinase receptor
- adipsin
- serine or cysteine proteinase inhibitor
- carbonic anhydrase
- lipoprotein lipase
- maleylacetoacetate isomerase
- DNA segment, Chr 9, ERATO Doi 394, expressed
- AU RNA-binding protein/enoyl-coenzyme A hydratase
- ESTs
- receptor RDC1 Mm.6522 Chemokine orphan receptor
- sterol carrier protein 2
- selenoprotein P
- RIKEN cDNA 0610009N12 gene
- general ret/ptc2
- Trk-fused gene
- ESTs
- kinase c-mer
- receptor plat.act.R
- cytochrome c oxidase
- fat specific gene 27
- UDP-glucuronosyltransferase 1
