# Supplementary material
Source: PubMed Central journal article supplement (PMC124512)
Supplement: pnas_99_10_6967__2.pdf [file pnas_99_10_6967__2.pdf]

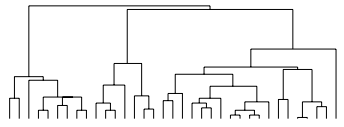

917288  
917289  
917290  
917291  
917292  
917293  
917294  
917295  
917296  
917297  
917298  
917299  
917300  
917301  
917302  
917303  
917304  
917305  
917306  
917307  
917308  
917309  
917310  
917311  
917312  
917313  
917314  
917315  
917316  
917317  
917318  
917319  
917320  
917321  
917322  
917323  
917324  
917325  
917326  
917327  
917328  
917329  
917330  
917331  
917332  
917333  
917334  
917335  
917336  
917337  
917338  
917339  
917340  
917341  
917342  
917343  
917344  
917345  
917346  
917347  
917348  
917349  
917350  
917351  
917352  
917353  
917354  
917355  
917356  
917357  
917358  
917359  
917360  
917361  
917362  
917363  
917364  
917365  
917366  
917367  
917368  
917369  
917370  
917371  
917372  
917373  
917374  
917375  
917376  
917377  
917378  
917379  
917380  
917381  
917382  
917383  
917384  
917385  
917386  
917387  
917388  
917389  
917390  
917391  
917392  
917393  
917394  
917395  
917396  
917397  
917398  
917399  
917400  
917401  
917402  
917403  
917404  
917405  
917406  
917407  
917408  
917409  
917410  
917411  
917412  
917413  
917414  
917415  
917416  
917417  
917418  
917419  
917420  
917421  
917422  
917423  
917424  
917425  
917426  
917427  
917428  
917429  
917430  
917431  
917432  
917433  
917434  
917435  
917436  
917437  
917438  
917439  
917440  
917441  
917442  
917443  
917444  
917445  
917446  
917447  
917448  
917449  
917450  
917451  
917452  
917453  
917454  
917455  
917456  
917457  
917458  
917459  
917460  
917461  
917462  
917463  
917464  
917465  
917466  
917467  
917468  
917469  
917470  
917471  
917472  
917473  
917474  
917475  
917476  
917477  
917478  
917479  
917480  
917481  
917482  
917483  
917484  
917485  
917486  
917487  
917488  
917489  
917490  
917491  
917492  
917493  
917494  
917495  
917496  
917497  
917498  
917499  
917500  
917501  
917502  
917503  
917504  
917505  
917506  
917507  
917508  
917509  
917510  
917511  
917512  
917513  
917514  
917515  
917516  
917517  
917518  
917519  
917520  
917521  
917522  
917523  
917524  
917525  
917526  
917527  
917528  
917529  
917530  
917531  
917532  
917533  
917534  
917535  
917536  
917537  
917538  
917539  
917540  
917541  
917542  
917543  
917544  
917545  
917546  
917547  
917548  
917549  
917550  
917551  
917552  
917553  
917554  
917555  
917556  
917557  
917558  
917559  
917560  
917561  
917562  
917563  
917564  
917565  
917566  
917567  
917568  
917569  
917570  
917571  
917572  
917573  
917574  
917575  
917576  
917577  
917578  
917579  
917580  
917581  
917582  
917583  
917584  
917585  
917586  
917587  
917588  
917589  
917590  
917591  
917592  
917593  
917594  
917595  
917596  
917597  
917598  
917599  
917600  
917601  
917602  
917603  
917604  
917605  
917606  
917607  
917608  
917609  
917610  
917611  
917612  
917613  
917614  
917615  
917616  
917617  
917618  
917619  
917620  
917621  
917622  
917623  
917624  
917625  
917626  
917627  
917628  
917629  
917630  
917631  
917632  
917633  
917634  
917635  
917636  
917637  
917638  
917639  
917640  
917641  
917642  
917643  
917644  
917645  
917646  
917647  
917648  
917649  
917650  
917651  
917652  
917653  
917654  
917655  
917656  
917657  
917658  
917659  
917660  
917661  
917662  
917663  
917664  
917665  
917666  
917667  
917668  
917669  
917670  
917671  
917672  
917673  
917674  
917675  
917676  
917677  
917678  
917679  
917680  
917681  
917682  
917683  
917684  
917685  
917686  
917687  
917688  
917689  
917690  
917691  
917692  
917693  
917694  
917695  
917696  
917697  
917698  
917699  
917700  
917701  
917702  
917703  
917704  
917705  
917706  
917707  
917708  
917709  
917710  
917711  
917712  
917713  
917714  
917715  
917716  
917717  
917718  
917719  
917720  
917721  
917722  
917723  
917724  
917725  
917726  
917727  
917728  
917729  
917730  
917731  
917732  
917733  
917734  
917735  
917736  
917737  
917738  
917739  
917740  
917741  
917742  
917743  
917744  
917745  
917746  
917747  
917748  
917749  
917750  
917751  
917752  
917753  
917754  
917755  
917756  
917757  
917758  
917759  
917760  
917761  
917762  
917763  
917764  
917765  
917766  
917767  
917768  
917769  
917770  
917771  
917772  
917773  
917774  
917775  
917776  
917777  
917778  
917779  
917780  
917781  
917782  
917783  
917784  
917785  
917786  
917787  
917788  
917789  
917790  
917791  
917792  
917793  
917794  
917795  
917796  
917797  
917798  
917799  
917800  
917801  
917802  
917803  
917804  
917805  
917806  
917807  
917808  
917809  
917810  
917811  
917812  
917813  
917814  
917815  
917816  
917817  
917818  
917819  
917820  
917821  
917822  
917823  
917824  
917825  
917826  
917827  
917828  
917829  
917830  
917831  
917832  
917833  
917834  
917835  
917836  
917837  
917838  
917839  
917840  
917841  
917842  
917843  
917844  
917845  
917846  
917847  
917848  
917849  
917850  
917851  
917852  
917853  
917854  
917855  
917856  
917857  
917858  
917859  
917860  
917861  
917862  
917863  
917864  
917865  
917866  
917867  
917868  
917869  
917870  
917871  
917872  
917873  
917874  
917875  
917876  
917877  
917878  
917879  
917880  
917881  
917882  
917883  
917884  
917885  
917886  
917887  
917888  
917889  
917890  
917891  
917892  
917893  
917894  
917895  
917896  
917897  
917898  
917899  
917900  
917901  
917902  
917903  
917904  
917905  
917906  
917907  
917908  
917909  
917910  
917911  
917912  
917913  
917914  
917915  
917916  
917917  
917918  
917919  
917920  
917921  
917922  
917923  
917924  
917925  
917926  
917927  
917928  
917929  
917930  
917931  
917932  
917933  
917934  
917935  
917936  
917937  
917938  
917939  
917940  
917941  
917942  
917943  
917944  
917945  
917946  
917947  
917948  
917949  
917950  
917951  
917952  
917953  
917954  
917955  
917956  
917957  
917958  
917959  
917960  
917961  
917962  
917963  
917964  
917965  
917966  
917967  
917968  
917969  
917970  
917971  
917972  
917973  
917974  
917975  
917976  
917977  
917978  
917979  
917980  
917981  
917982  
917983  
917984  
917985  
917986  
917987  
917988  
917989  
917990  
917991  
917992  
917993  
917994  
917995  
917996  
917997  
917998  
917999  
918000

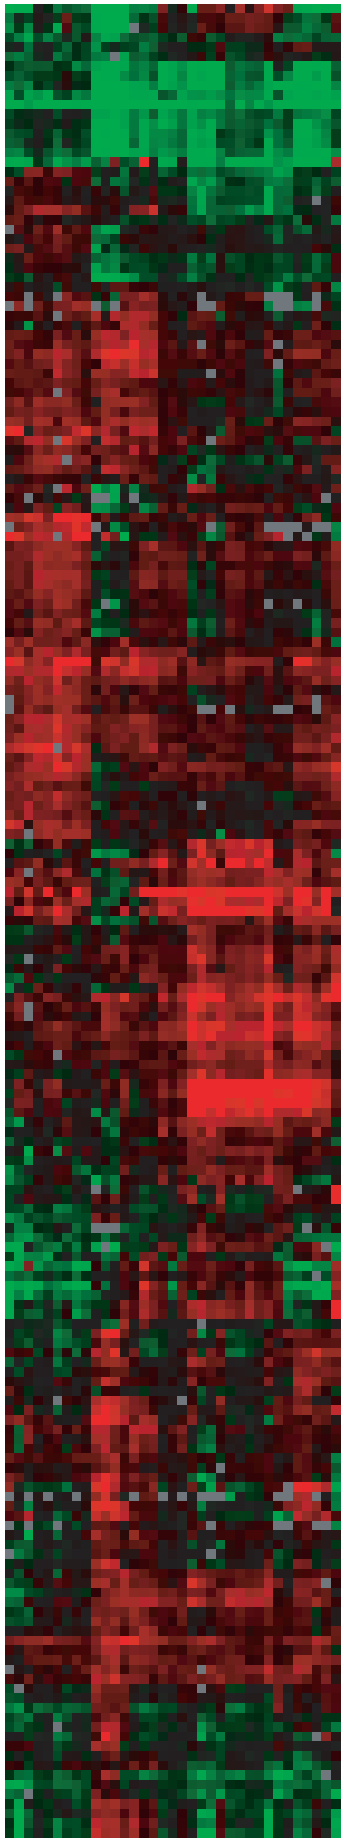

ap1 poprotein C1  
acid sphingomyelinase-like phosphodiesterase 3a  
"phosphatidylinositol 3-kinase, C2 domain containing, alpha polypeptide"  
glucocorticoid-induced leucine zipper  
ESTs, Moderately similar to POLLEN SPECIFIC PROTEIN SF3 [Helianthus annuus]  
receptor, ROR-gamma, Mm 4372 RAR-related orphan receptor gamma  
modifications PS29/SAPRO1-like  
effector, calmodulin 3 Mm 1147 Calmodulin 3  
ESTs, Highly similar to AMNE QUIDISE [Rattus norvegicus]  
glutathione transferase zeta 1 methylacetacetate isomerase  
receptor, CD86  
repair, Koz1  
effector, vasc. perneab. Mm 15607 Mus musculus VEGF-related factor mvr186 precursor mRNA complete cds  
general myogenic Mm 16528 Myogenin  
general N-ras Mm 11204 ESTs, Highly similar to UNR PROTEIN [Rattus norvegicus]  
H2F1  
lymphocyte antigen 6 complex  
DNA-binding protein A  
heat shock 10 kDa protein 1 chaperonin 10  
general E1a binding Mm 24289 ESTs  
general crk 2  
histidine triad nucleotide-binding protein  
adenylosuccinate lyase  
DNA segment, Chr 7, Roswell Park 2 complex, expressed  
receptor, prostag. R-ep1 Mm 29746 ESTs, Highly similar to MTOCHONDRIAL 60S RIBOSOMAL PROTEIN L3 [Rattus norvegicus]  
"Mus musculus calmodulin-calmodulin-dependent protein kinase II delta mRNA, partial cds"  
thioredoxin nuclear gene encoding mitochondrial protein  
cytoskeletal peroxisome Mm 16453 Mus musculus peroxisome membrane protein PEK2 mRNA complete cds  
peroxisome 5  
cell cycle cyclin B Mm 22569 Cyclin B1 related sequence 1  
ESTs, Highly similar to PROBABLE SERINE/THREONINE-PROTEIN KINASE YL1095W [Saccharomyces cerevisiae]  
cytoskeletal, tropomyosin Mm 4585 Mouse tropomyosin isoform 2 mRNA complete cds  
ESTs, Highly similar to ACTIVATOR 1 36 KD SUBUNIT [Homo sapiens]  
TF CACCC-box Mm 28483 ESTs, Highly similar to ZINC FINGER PROTEIN 126 [Homo sapiens]  
ESTs, Highly similar to ALPHA-SOLUBLE NSF ATTACHMENT PROTEIN HOMOLOG [Mus musculus]  
general, dek  
mitochondrial chromosome maintenance deficient 4 homolog S. cerevisiae  
cytoskeletal, trichyalin Mm 1160 ESTs  
procollagen, type V, alpha 2  
vanin 1  
general, gase Mm 25 Growth arrest specific 2  
hormone/GP parathyroid-like  
hormone/GP PDGF a  
nuclear, autointergenic sperm protein histone-binding  
cell cycle cdc 25c Mm 5327 ESTs  
B-cell receptor-associated protein 37  
ESTs, Highly similar to REPLICATOR PROTEIN A 14 KD SUBUNIT [Homo sapiens]  
"ornithine decarboxylase, structural"  
high mobility group protein  
receptor, adenosine R-A2 Mm 23969 ESTs  
succinate-Coenzyme A ligase, GDP-forming, beta subunit  
I3 protein  
heat-responsive protein 12  
myelocytomatosis oncogene  
general fos B  
general activator 1  
ribosomal protein L19  
TF, homeotic 8 Mm 870 Homeo box msh-like 1  
general, amphaxin Mm 22024 Cortactin  
general EXT1 Mm 5293 Dkk1-like homolog Drosophila  
general HCP1 Mm 27545 ESTs, Highly similar to HNRNP METHYLTRANSFERASE [Saccharomyces cerevisiae]  
general HES1 Mm 1075 ESTs, Highly similar to p22 [H. sapiens]  
general, smp  
enhancer of zeste homolog 1 Drosophila  
ribosomal protein L30  
ESTs, Highly similar to T-CELL SURFACE PROTEIN TACTILE PRECURSOR [Homo sapiens]  
ESTs, Highly similar to HYPOTHETICAL 31.1 KD PROTEIN B0222.7 [IN CHROMOSOME 1] [Caenorhabditis elegans]  
stress, hsp86 Mm 1943 Mouse mRNA for HSP86 heat-shock protein  
prothymosin alpha  
"RNA binding motif protein, X chromosome retrogene"  
ESTs, Highly similar to PUTATIVE ATP-DEPENDENT RNA HELICASE C1F7.02C [Schizosaccharomyces pombe]  
general, shb  
unknown  
sperm specific antigen 1  
chaperonin subunit 6a zeta  
elF3 p66  
DNA segment, Chr 11, ERATO D01 175, expressed  
phosphatase c neliobirin  
lysosomal acid lipase 1  
repair ERCC  
eukaryotic translation elongation factor 1-beta homolog  
structure, histone H1, 2 Mm 22570 HISTONE H1, 1  
kinase, MAPK, active Mm 2569 ESTs, Highly similar to DUAL SPECIFICITY MTOGEN-ACTIVATED PROTEIN KINASE KINASE 2 [Homo sapiens]  
general, DPCA Mm 3632 MAD homolog 4 Drosophila  
nucleophosmin  
ESTs, Highly similar to ENV POLYPROTEIN PRECURSOR [Gibbon leukemia virus]  
voltage-dependent anion channel 1  
insulin-like growth factor-binding protein, acid labile subunit  
Unknown  
"RAB4A, member RAS oncogene family"  
repair, DNA, epial  
extracellular proteinase inhibitor  
folate binding protein 1  
myelin basic protein  
cell cycle L-piastin Mm 22510 Mouse mRNA for 65-kDa macrophage cytosolic protein complete cds  
cytoskeletal cyclin  
cytoskeletal villin Mm 4010 Villin  
cell cycle cdc2 Mm 260 Mus musculus cyclin-dependent kinase-2 alpha Cdk2-alpha mRNA complete cds  
cell cycle TAPA-1 Mm 806 CD81 ANTI GEN  
cell cycle cleavage stim  
or protein, converase subtilisin/kexin type 3  
transcobalamin 2  
immediate early response 3  
cyclin D1  
cyclin D2  
calpain 12  
cytoskeletal integral Mm 20938 Mus musculus form binding protein 21 mRNA complete cds  
TF, BRG1 Mm 34803 ESTs, Moderately similar to HOMEOTIC GENE REGULATOR [Drosophila melanogaster]  
modification cdc42-HS bind Mm 1483 Mus musculus non-receptor protein tyrosine kinase Ack mRNA complete cds  
TF, Homeo, 1, 4 Mm 147 Homeo box A7  
general, mam growth inh. Mm 2220 Fatty acid binding protein heart 1  
aldolase 3, C isoform  
aldolase 3, C isoform  
aldolase 3, C isoform  
aldolase 3, C isoform  
"collin 1, non-muscle"  
TF, TEFS Mm 2010 TEA domain family member 2  
adhesion cell adh. reg. Mm 297 Actin-beta cytoplasmic  
general discs Mm 382 Discs-large homolog 1 Drosophila  
modification UNC-104/KIF1a Mm 4312 Mus musculus Nav/H+ exchanger NHE-1 mRNA complete cds  
cytoskeletal villin Mm 4551 EZRIN  
inositol 1,4,5-triphosphate receptor 1  
ap1 poprotein C1  
unknown  
Harvey rat sarcoma virus oncogene  
maternal inhibition of differentiation  
receptor, retinoid X R  
ESTs, Moderately similar to THYMOSIN BETA-4 [Xenopus laevis]  
caspase 11  
receptor, ciliary neur. Mm 20236 Pacay accelerating factor 1  
cell cycle rb Mm 304 Retinoblastoma 1  
adenylosuccinate lyase  
cytoskeletal filaggrin  
beta-2 microglobulin  
TF, homeotic  
TF, Zn finger  
TF, E2F Mm 925 Transcription factor Dp 1  
phenylalanine hydroxylase  
early growth response 1  
cytoskeletal dentin  
hormone/GP, con. tiss. Gf Mm 1810 Fibroblast inducible secreted protein  
aplysia ras-related homolog 9 Rhod  
Unknown  
ESTs, Highly similar to ALPHA-ACTININ 1, CYTOSKELETAL ISOFORM [Homo sapiens]  
ESTs, Highly similar to RAS-RELATED PROTEIN RAC1 [Drosophila melanogaster]  
cyclin-dependent kinase inhibitor 1A P21  
DNA segment, Chr 15, Wayne State University 77, expressed  
effector I-K-B2 Mm 8884 Mus musculus I-kappa B alpha chain mRNA complete cds  
ERG-associated protein  
hormone/GP, thymosin B-10 Mm 3532 ESTs, Moderately similar to THYMOSIN BETA-10 [Homo sapiens; Rattus norvegicus; Equus caballus]  
cytoskeletal, metrin  
NF-YB-like protein  
ESTs, Highly similar to TRANSCRIPTION FACTOR E3 [Homo sapiens]  
dihydrodiphenylacetate reductase  
ribosomal protein L44  
general, c-myc Mm 2444 Myelocytomatosis oncogene  
cytoskeletal, tenascin-Rec Mm 980 Tenascin  
N-myc downstream regulated 1  
receptor, benzodiazepine Mm 1508 Benzodiazepine receptor peripheral  
motor, M-croto. assoc. Mm 12625 M-croto. tubul. associated protein 4  
receptor, TSH R Mm 20764 Tyrosine kinase 2c29  
nuclear factor of kappa light chain gene enhancer in B-cells 1, p105  
ESTs, Moderately similar to KINESIN-LIKE PROTEIN KIF4 [Mus musculus]  
integrin beta 1 fibronectin receptor beta  
phosphoprotein enriched in astrocytes 15  
amyloid beta A4 precursor protein  
amyloid beta A4 precursor protein  
TF, HAP2/CAATbind  
TF, G1/3k upl.  
ESTs, Highly similar to TRANSDUCIN-LIKE ENHANCER PROTEIN 1 [Homo sapiens]  
proliferating cell nuclear antigen  
apoptosis ICH-1/L15 Mm 3921 Caspase 2  
dystroglycan 1  
ESTs, Moderately similar to DUAL SPECIFICITY PROTEIN PHOSPHATASE PAC-1 [Homo sapiens]  
"solute carrier family 20, member 1"  
synthesis DNA pol D Mm 5788 Polymerase DNA directed, delta 2 regulatory subunit 50kDa  
structure, hmg 14 Mm 2756 High mobility group protein 14  
growth arrest and DNA-damage-inducible, alpha  
"RNA binding motif, single stranded interacting protein 1"  
ESTs, Highly similar to HYPOTHETICAL 28.9 KD PROTEIN C28H8.6 IN CHROMOSOME 11 [Caenorhabditis elegans]  
ESTs, Weakly similar to ANTI GEN WC1.1 [Bos taurus]  
Unknown  
"protein phosphatase 3, catalytic subunit, gamma isoform"  
TF, TEL Mm 2017 Ets variant gene 6 TEL oncogene  
"platelet derived growth factor, alpha"  
annexin A5  
hormone/GP, galani Mm 4655 Galani  
cytoskeletal radixin Mm 7051 RADIXIN  
effector, caldesmon 1  
effector, calcyclin Mm 1221 Calcyclin  
effector, calcium prot. Mm 1221 Calcyclin
