# Supplementary material
Source: PubMed Central journal article supplement (PMC124512)

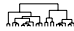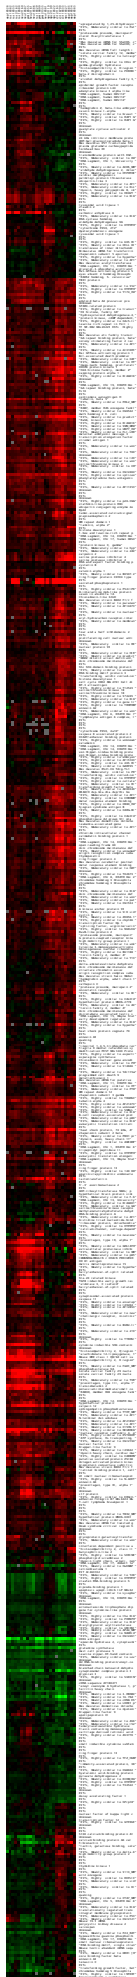

Supplement: pnas_99_10_6967__3.pdf [file pnas_99_10_6967__3.pdf]
